# Supplementary material for: Assessing predictors of intention to prescribe sick leave among primary care physicians using the theory of planned behaviour
Source: Springer Nature journal article supplement (doi:10.1186/s12875-017-0690-5), 2018-01-16
Supplement: MOESM1 [file 15368580]

# *Clinician Survey In Providing Sickness Leaves To Patients (Questionnaire 1)*

This survey is part of a larger project aimed at better understanding the beliefs and attitudes that contribute to the behaviour in providing medical certification for patients. By gathering information from many medical officers, we hope to learn what factors are most important in affecting the intention in providing medical certification to patients.

This booklet contains a series of brief questionnaires that take about 15 minutes to complete. Please answer EVERY question in the booklet. Instructions on how to respond to the different questionnaires in the booklet are provided at the top of each page. Please note that there are no right or wrong answers, just what YOU think and how YOU perceive your work situation.

All the information that you provide in this session will be held in confidentiality. Your responses will be kept by the researchers, and we will aggregate responses from all interviews so that no one individual will be identifiable.

Subject Number \_\_ \_\_ \_\_  
Clinic \_\_\_\_\_

## Background Information

*For each question below, either write in your answer in the space given.*

1. What is your profession? (medical officer/family medicine specialist)
2. How many years of experience do you have working in this profession? \_\_\_\_\_ yrs
3. Are you \_\_\_\_\_ Male or \_\_\_\_\_ Female?
4. How long have you been working in this clinic? \_\_\_\_\_ years and \_\_\_\_\_ months
5. What is your age? \_\_\_\_\_ years old

## Generalised Intention

*Directions: use the scale below to indicate how much you agree or disagree with each statement by circling the number that best corresponds to your answer in the space next to the question number. Remember there are no right or wrong answers, only what is TRUE of you.*

| Question Format                                                         | Response Format                                       |
|-------------------------------------------------------------------------|-------------------------------------------------------|
| I expect to provide patients MCs during outpatient consultation         | <i>Strongly Disagree 1 2 3 4 5 6 7 Strongly Agree</i> |
| I want to provide patients with MCs during an outpatient consultation   | <i>Strongly Disagree 1 2 3 4 5 6 7 Strongly Agree</i> |
| I intend to provide patients with MCs during an outpatient consultation | <i>Strongly Disagree 1 2 3 4 5 6 7 Strongly Agree</i> |

## Attitude

*Directions: use the scale below to indicate how much you agree or disagree with each statement by circling the number that best corresponds to your answer in the space next to the question number. For the indirect measurement section, answer briefly on what you think is your interpretation of your working environment. Remember there are no right or wrong answers, only what is TRUE of you.*

A patient attends the outpatient clinic for routine consultation. The target behaviour is providing sickness certification to the patient:

| Question Format                                                                            | Response Format                                                                                                                                                                                    |
|--------------------------------------------------------------------------------------------|----------------------------------------------------------------------------------------------------------------------------------------------------------------------------------------------------|
| Providing patients with MCs is                                                             | <i>harmful 1 2 3 4 5 6 7 beneficial</i><br><br><i>good 1 2 3 4 5 6 7 bad</i><br><br><i>pleasant (for me) 1 2 3 4 5 6 7 unpleasant (for me)</i><br><br><i>not important 1 2 3 4 5 6 7 important</i> |
| Trusting the intentions of patients who request for MCs during outpatient consultations is | <i>harmful 1 2 3 4 5 6 7 beneficial</i><br><br><i>good 1 2 3 4 5 6 7 bad</i><br><br><i>pleasant (for me) 1 2 3 4 5 6 7 unpleasant (for me)</i><br><br><i>worthless 1 2 3 4 5 6 7 useful</i>        |

## Subjective Norm

*Directions: use the scale below to indicate how much you agree or disagree with each statement by circling the number that best corresponds to your answer in the space next to the question number. For the indirect measurement section, answer briefly on what you think is your interpretation of your working environment. Remember there are no right or wrong answers, only what is TRUE of you.*

A patient presents with to the outpatient clinic for consultation. The target behaviour is providing the patient with MCs:

| Question Format                                                                                                                     | Response Format                                              |
|-------------------------------------------------------------------------------------------------------------------------------------|--------------------------------------------------------------|
| Most people who are important to me think that ..... be strict in providing MCs to patients come for outpatient clinic consultation | <i>I should not <b>1 2 3 4 5 6 7</b> I should</i>            |
| It is expected of me to provide MCs to patients who come for outpatient clinic consultations                                        | <i>Strongly Disagree <b>1 2 3 4 5 6 7</b> Strongly Agree</i> |
| I feel under social pressure to provide MCs to patients who have come for outpatient consultations.                                 | <i>Strongly Disagree <b>1 2 3 4 5 6 7</b> Strongly Agree</i> |
| People who are important to me recommend that I be strict in providing MCs to patients who have come for outpatient consultations.  | <i>Strongly disagree <b>1 2 3 4 5 6 7</b> Strongly agree</i> |

## Perceived Control

*Directions: use the scale below to indicate how much you agree or disagree with each statement by circling the number that best corresponds to your answer in the space next to the question number. For the indirect measurement section, answer briefly on what you think is your interpretation of your working environment. Remember there are no right or wrong answers, only what is TRUE of you.*

| Question Format                                                                               | Response Format                                       |
|-----------------------------------------------------------------------------------------------|-------------------------------------------------------|
| I am confident that I could provide patients with MCs appropriately based on the consultation | <i>Strongly Disagree 1 2 3 4 5 6 7 Strongly Agree</i> |
| The decision for me to provide my patients with MCs is                                        | <i>Easy 1 2 3 4 5 6 7 Difficult</i>                   |
| The decision to provide MCs is beyond my control                                              | <i>Strongly Disagree 1 2 3 4 5 6 7 Strongly Agree</i> |
| It is entirely up to me whether I provide MC or not                                           | <i>Strongly disagree 1 2 3 4 5 6 7 Strongly Agree</i> |

**-Infinite Thanks for Your Time And Effort-**
